# Supplementary material
Source: HighWire-hosted journal article supplement (https://qdcxjkg.com/highwire/filestream/114127/field_highwire_adjunct_files/0/ERJ-00882-2012_Disclosures.pdf)
Supplement: ERJ-00882-2012_Disclosures.pdf [file ERJ-00882-2012_Disclosures.pdf]

**T. Bellander** has received a research grant from the Swedish Transport Administration.
